1  
2  
3  
4  
5  
6  
7  
8  
9  
10  
11  
12  
13  
14  
15  
16  
17  
18  
19  
20  
21  
22  
23  
24  
25  
26

## Harnessing the power of eDNA metabarcoding for the detection of deep-sea fishes

Beverly McClenaghan<sup>1\*</sup>, Nicole Fahner<sup>1</sup>, David Cote<sup>2</sup>, Julek Chawarski<sup>3</sup>, Avery McCarthy<sup>1</sup>, Hoda Rajabi<sup>1</sup>, Greg Singer<sup>1</sup>, Mehrdad Hajibabaei<sup>1,4\*</sup>

<sup>1</sup>Centre for Environmental Genomics Applications, eDNAtec Inc., St. John's, NL, Canada

<sup>2</sup>Fisheries and Oceans Canada, Northwest Atlantic Fisheries Centre, St. John's, NL, Canada

<sup>3</sup>Centre for Fisheries Ecosystem Research, Fisheries & Marine Institute, Memorial University of Newfoundland, St. John's, NL, Canada

<sup>4</sup>Centre for Biodiversity Genomics & Department of Integrative Biology, University of Guelph, Guelph, ON, Canada

\*Corresponding author

E-mail: [hajibabaei@gmail.com](mailto:hajibabaei@gmail.com) (MH)

Running Title: eDNA metabarcoding deep-sea fishes

## 27 **Abstract**

28           The deep ocean is the largest biome on Earth and faces increasing anthropogenic  
29 pressures from climate change and commercial fisheries. Our ability to sustainably manage this  
30 expansive habitat is impeded by our poor understanding of its inhabitants and by the difficulties  
31 in surveying and monitoring these areas. Environmental DNA (eDNA) metabarcoding has great  
32 potential to improve our understanding of this region and to facilitate monitoring across a  
33 broad range of taxa. Here, we evaluate two eDNA sampling protocols and seven primer sets for  
34 elucidating fish diversity from deep sea water samples. We found that deep sea water samples  
35 (> 1400 m depth) had significantly lower DNA concentrations than surface or mid-depth  
36 samples necessitating a refined protocol with a larger sampling volume. We recovered  
37 significantly more DNA in large volume water samples (1.5 L) filtered at sea compared to small  
38 volume samples (250 mL) held for lab filtration. Furthermore, the number of unique sequences  
39 (exact sequence variants; ESVs) recovered per sample was higher in large volume samples.  
40 Since the number of ESVs recovered from large volume samples was less variable and  
41 consistently high, we recommend the larger volumes when sampling water from the deep  
42 ocean. We also identified three primer sets which detected the most fish taxa but recommend  
43 using multiple markers due the variability in detection probabilities and taxonomic resolution  
44 among fishes for each primer set. Overall, fish diversity results obtained from metabarcoding  
45 were comparable to conventional survey methods. While eDNA sampling and processing need  
46 be optimized for this unique environment, the results of this study demonstrate that eDNA  
47 metabarcoding can be employed to facilitate biodiversity surveys in the deep ocean, require

48 less dedicated survey effort per unit identification and are capable of simultaneously providing  
49 valuable information on other taxonomic groups.

50 **Keywords:** environmental DNA; fisheries; marine biomonitoring; metabarcoding

## 51 **Introduction**

52 The deep ocean is the largest biome on Earth by volume and also one of the planet's most  
53 understudied environments [1]. The biodiversity of the deep ocean has not been fully explored  
54 nor is the distribution and biology of many deep-water species well understood [1–3]. Despite  
55 our limited knowledge of deep-water fauna, several species are commercially targeted and,  
56 along with many other taxa, face increasing pressure from climate change [4–6]. Monitoring  
57 and managing the impacts of commercial fishing and climate change in this environment is  
58 difficult due to logistic constraints and the high cost of sampling such challenging environments  
59 [7]. Despite these impediments, documenting the biodiversity of this region is integral to  
60 sustainable management and ecosystem monitoring.

61 Deep ocean biodiversity surveys are often done using a combination of methods, each  
62 targeting a particular taxonomic group. For fish and micronekton, trawling, long-lining, and  
63 acoustic monitoring are often used. Small nets and filtration systems can target small  
64 zooplankton and phytoplankton and autonomous video camera systems can capture a range of  
65 macrofauna [8]. Each of these methods have limitations in their ability to capture a community  
66 based on morphological and behavioral selectivity as well as taxonomic resolution. Additionally,  
67 not all of these methods can be employed equally well in all areas of the ocean. For example,  
68 bottom trawling is ineffective for surveying along steep slopes and rocky surfaces and is

69 undesirable in areas with sensitive epifauna, such as deep-water corals and sponges [9,10]. The  
70 need to employ multiple sampling methods to assess the biodiversity of the deep sea increases  
71 the sampling effort required, complicates the interpretation of data, and thereby adds to the  
72 challenges of surveying this environment.

73 Metabarcoding using environmental DNA (eDNA) is a relatively new approach to  
74 biodiversity analysis that can facilitate surveys by reducing the sampling effort and taxonomic  
75 expertise required and thus far metabarcoding has been underutilized in the deep ocean [11].  
76 Marine eDNA studies have primarily surveyed coastal and/or surface water (e.g. [12,13]), with  
77 very few studies sampling water at depths > 1000m for eukaryotic eDNA (but see [14]). Much of  
78 the eDNA work on deep-sea communities has focused on sediment sampling to study benthic  
79 communities (e.g. [15–17]) as opposed to fish and pelagic communities.

80 Using eDNA from deep sea water samples to characterize biodiversity has the potential to  
81 provide critical insight into deep ocean biodiversity however, eDNA sampling protocols need to  
82 be optimized for this environment. Abiotic factors, such as the reduced light levels and  
83 comparatively low variability in temperature and salinity in deep ocean water [2], affect the  
84 persistence of eDNA while biotic factors, such as the predominant life histories and/or  
85 metabolism of the organisms living in the deep ocean (e.g. slower metabolism; [18]), may affect  
86 the amount of eDNA released into the water. Therefore, the optimal protocols for eDNA  
87 sampling in the deep ocean must be determined separately from coastal and surface marine  
88 water sampling and furthermore, sample processing should be optimized for the particular  
89 target groups of deep-sea organisms (e.g. fish).

90 The objectives of this study were to develop an eDNA metabarcoding sampling protocol for  
91 the deep sea, evaluate the performance of multiple primer sets for the detection of deep-sea  
92 fishes and compare eDNA results to conventional fish surveys. We collected seawater samples  
93 over two sampling seasons and refined the sampling and lab protocols in the second season to  
94 improve the detection of deep-sea fishes. While fishes were the target group, we also report  
95 general biodiversity results that were detected concurrently.

## 96 **Methods**

### 97 *Study Area*

98 We surveyed fish communities in the Labrador Sea, in the Northwest Atlantic Ocean, in  
99 the summer (June-August) over three sampling years. Surveys using conventional sampling  
100 techniques (2017-2019) and eDNA water sampling (2018-2019) were conducted along three  
101 transects each covering a water depth gradient of approximately 500 m to 3000 m (see S1 Fig  
102 for map and S1 Table for GPS coordinates). All field sampling was conducted under  
103 experimental licenses from Fisheries and Oceans Canada.

104

### 105 *Conventional Fish Surveys*

106 Harvester logbooks and research vessel (RV) surveys using Campelen trawls are typically  
107 used to monitor and manage demersal fish communities in Canadian waters but these  
108 collections are restricted to waters less than 1500m and are relatively sparse for northern areas  
109 [19]. In deeper waters (>1500 m) of the Labrador Sea, there is very limited information on  
110 demersal or pelagic fish communities. Therefore, to augment species lists from RV surveys and

111 logbooks, targeted sampling of demersal (baited hooks and cameras; [19]) and pelagic (Isaac  
112 Kidd Midwater Trawls (IKMT) [20]) fish was conducted in the study area. Demersal fish sampling  
113 was conducted along two transect lines in 2017 and 2019, whereas pelagic fish communities  
114 were sampled across three transect lines in 2018 and 2019. Baited hooks and cameras were  
115 deployed on the ocean bottom whereas IKMT samples were collected from the mesopelagic  
116 deep-scattering layer (an area of concentrated pelagic biomass [21]; sampled depths ranged  
117 from 360 – 536 m) as detected by hull-mounted echosounders. Fish captured using both  
118 methods were identified morphologically. While the exact sampling sites differed for pelagic  
119 and demersal sampling sites, pelagic sampling was conducted over the same transects as the  
120 demersal sampling but was restricted to a maximum water depth of 2500 m (versus a  
121 maximum depth of ~3000 m for demersal sampling).

### 122 *eDNA Water Sample Collection*

123 eDNA water samples were collected from seven stations along one transect in 2018. In  
124 2019, two of these stations were resampled and water samples were collected from an  
125 additional eight stations along the two other transects. At each station, samples were collected  
126 from the surface, the deep scattering layer and just above the bottom up to a depth of ~2,500  
127 m depth (n = 144, S1 Table). Water samples were co-located in time and space with pelagic fish  
128 (IKMT) sampling. Samples were collected using a Niskin-style rosette sampler. Rosette bottles  
129 were assigned to eDNA sampling for the duration of the field mission and were decontaminated  
130 prior to sampling and between stations using ELIMINase (Decon Labs). At each sampling  
131 station, a field blank was collected using distilled water to control for potential contamination.  
132 In 2018, we employed a sampling strategy adapted from previous coastal surface water

133 sampling in the North Atlantic [22], where triplicate 250 mL samples were collected at each  
134 sampling depth. Water samples were then frozen at -20°C and shipped frozen to the lab for  
135 subsequent processing. Water filtration took place in a clean lab, thereby reducing the potential  
136 for sample contamination, however cold storage space was required on the vessel to store  
137 water samples. Based on the results of 2018 sampling, the sampling strategy was modified for  
138 2019. We increased the water volume collected by a factor of 6, collecting triplicate 1.5 L water  
139 samples in 2019, however the larger volume of water collected could not be kept in cold  
140 storage on the vessel due to space limitations. As such, water samples in 2019 were filtered on  
141 the vessel. Filter cartridges (requiring less storage space) were stored at -20°C for the duration  
142 of the expedition.

### 143 *Laboratory Procedures*

144 All water samples were filtered through 0.22 µm PVDF Sterivex filters (MilliporeSigma)  
145 using a peristaltic pump. Filtration on the vessel took place in a dedicated lab space that  
146 included a positive pressure ventilation system. Before each filtration session, surfaces and  
147 equipment were all decontaminated with ELIMINase and rinsed with deionized water. Filtration  
148 began immediately after sample collection (average volume filtered  $1.35 \pm 0.15$  L). For samples  
149 filtered in the lab, filtration took place in a PCR clean lab under a laminar flow hood (AirClean  
150 Systems) which was decontaminated using ELIMINase, lab-grade water and 70% ethanol prior  
151 to each sample set. Water samples were thawed at 4°C and immediately filtered. DNA was  
152 extracted from all filter membranes using the DNeasy PowerWater Kit (Qiagen). DNA extracts  
153 were quantified using the Quant-iT PicoGreen dsDNA assay with a Synergy HTX plate  
154 fluorometer (BioTek).

155           Seven DNA markers from three gene regions (cytochrome c oxidase I (COI), 12S and 18S)  
156 were selected to assess eukaryotic biodiversity in the 2018 samples (Table 1A), including three  
157 primer sets specifically for bony fish. The 2019 samples were analyzed with only these three  
158 fish-targeting primer sets. Each PCR reaction contained 1X reaction buffer, 2 mM MgCl<sub>2</sub>, 0.2mM  
159 dNTPs, 0.2 μM of each of the forward and reverse Illumina-tailed primers, 1.5U Platinum Taq  
160 (Invitrogen) and 1.2 μL of DNA in a total volume of 15 μL. Due to the higher concentration of  
161 DNA recovered from 2019 samples, diluted DNA was used for 2019 samples (1/10 and 1/2 for  
162 surface samples and samples at depth, respectively). See Table 1B for PCR conditions for all  
163 primer sets. Three PCR replicates were performed for each primer set from each sample and  
164 then pooled for a single PCR cleanup with the QIAquick 96 PCR purification kit (Qiagen).

165           Amplicons were visualized using agarose gel (1.5% w/v) electrophoresis to verify  
166 amplification of DNA markers and to assess negative controls generated during PCR, extraction,  
167 filtration, and field collection. Negative controls were carried through to sequencing as an  
168 added level of verification. Amplicons were then indexed using unique dual Nextera indexes  
169 (IDT; 8-bp index codes). Indexing PCR conditions were initiated for 3 mins at 95°C, followed by  
170 12 cycles of 95°C for 30s, 55°C for 30s, and 72°C for 30s, and a final extension at 72°C  
171 for 5mins. Amplicons were quantified with Quant-iT PicoGreen dsDNA assay and pooled  
172 together in equimolar concentrations by DNA marker. Amplicon pools were cleaned using  
173 AMPure XP cleanups, quantified with a Qubit fluorometer (Thermo Fisher) and the size  
174 distribution of each pool was verified with the DNA 7500 kit on the Agilent 2100 Bioanalyzer.  
175 The 2018 12SV5, COI Leray, COI MiniFishE, 18SV9M, and COI F230 amplicon pools were



176 combined into one library. The 2019 12Steleo, 12S MiFishU and COI MiniFishE amplicons pools  
177 were combined with the

178 **Table 1. Marker summary indicating (A) the gene region, primer sequences, citation, and sample set(s) (2018 and 2019) the**  
 179 **marker was used on and (B) the amplicon insert size and PCR conditions used for each marker.**

180

181 **A**

| DNA Marker                         | Gene Region | Forward Primer                                                                   | Reverse Primer                                 | Citation                      | 2018 Samples | 2019 Samples |
|------------------------------------|-------------|----------------------------------------------------------------------------------|------------------------------------------------|-------------------------------|--------------|--------------|
| Leray<br>(mICOLintF/<br>jgHCO2198) | COI         | 5'-<br>GGWACWGGWTGAACWGTWTA<br>YCCYCC-3'                                         | 5'-<br>TAAACTTCAGGGTGACCAAAAAT<br>CA-3'        | Leray et al.<br>2013 [23]     | Y            |              |
| MiniFishE (Mini_SH-<br>E)          | COI         | 5'-<br>ACYAANCAYAAAGAYATNGGCAC<br>-3'                                            | 5'-<br>CTTATRTRTTTATNCGNGGRAAN<br>GC-3'        | Shokralla et<br>al. 2015 [24] | Y            | Y            |
| F230                               | COI         | 5'-<br>GGTCAACAAATCATAAAGATATT<br>GG-3'                                          | 5'-<br>CTTATRTRTTTATNCGNGGRAAN<br>GC-3'        | Gibson et al.<br>2015 [25]    | Y            |              |
| 18SV9M                             | 18S         | 5'-GTACACACCGCCCGTC-3'                                                           | 5'-<br>TGATCCTTCTGCAGGTTACCTAC-<br>3'          | Stoeck et al.<br>2010 [26]    | Y            |              |
| 12SV5                              | 12S         | 5'-ACTGGGATTAGATACCCC-3'                                                         | 5'-TAGAACAGGCTCCTCTAG-3'                       | Riaz et al.<br>2011 [27]      | Y            |              |
| 12Steleo                           | 12S         | 5'-ACACCGCCCGTCACTCT-3'<br>Blocking: 5'-<br>ACCTCCTCAAGTATACTTCAAAG<br>GAC-SPC3I | 5'-CTTCCGGTACTTACCATG-3'                       | Valentini et<br>al. 2016 [28] | Y            | Y            |
| MiFishU                            | 12S         | 5'-<br>NNNNNGTCGGTAAACTCGTG<br>CCAGC-3'                                          | 5'-<br>NNNNNCATAGTGGGGTATCTAA<br>TCCCAGTTTG-3' | Miya et al.<br>2015 [29]      | Y            | Y            |

182

183

**B**

| DNA Marker                         | Amplicon Insert Size | Initial        | # Cycles | Denaturation   | Annealing      | Extension      | Final Extension |
|------------------------------------|----------------------|----------------|----------|----------------|----------------|----------------|-----------------|
| Leray<br>(mICOLintF/<br>jgHCO2198) | 330                  | 5 min<br>95°C  | 35       | 40 sec<br>94°C | 60 sec<br>46°C | 30 sec<br>72°C | 5 min<br>72°C   |
| FishE (Mini_SH-E)                  | 226                  | 5 min<br>95°C  | 35       | 40 sec<br>94°C | 60 sec<br>46°C | 30 sec<br>72°C | 5 min<br>72°C   |
| F230                               | 226-235              | 3 min<br>95°C  | 35       | 30 sec<br>94°C | 40 sec<br>46°C | 60 sec<br>72°C | 10 min<br>72°C  |
| 18SV9M                             | 145                  | 3 min<br>95°C  | 35       | 30 sec<br>94°C | 30 sec<br>55°C | 60 sec<br>72°C | 10 min<br>72°C  |
| 12SV5                              | 107                  | 7 min<br>95°C  | 35       | 30 sec<br>95°C | 30 sec<br>52°C | 30 sec<br>72°C | 10 min<br>72°C  |
| 12Steleo                           | 100                  | 10 min<br>95°C | 35       | 30 sec<br>94°C | 30 sec<br>55°C | 10 sec<br>72°C | 5 min<br>72°C   |
| MiFishU                            | 163-185              | 3 min<br>95°C  | 35       | 20 sec<br>95°C | 15 sec<br>55°C | 15 sec<br>72°C | 5 min<br>72°C   |

184

185

186

187 2018 12Steleo and 12S MiFishU amplicon pools in a second library. The libraries were  
188 sequenced with a 300-cycle S1 kit and a 500-cycle SP kit, respectively, on the NovaSeq 6000  
189 following the NovaSeq standard workflow with a target minimum sequencing depth of 1 million  
190 sequences per sample per amplicon. Raw sequence reads are available in NCBI's sequence read  
191 archive under project PRJNA643526.

## 192 *Bioinformatics*

193 Base calling and demultiplexing were performed using Illumina's bcl2fastq software  
194 (v2.20.0.422). Primers were trimmed from sequences using *cutadapt* v1.16 [30] and then  
195 DADA2 v1.8.015 [31] was used for quality filtering, joining paired end reads (maxEE=0.2,  
196 minQ=2, truncQ=2, maxN=0) and denoising using default parameters to produce exact  
197 sequence variants (ESVs). Taxonomy was assigned to ESVs using NCBI's blastn tool v1.9.0 [32]  
198 and the *nt* database (downloaded: November 30, 2019) with an e-value cut-off of 0.001. In  
199 cases where a sequence matched multiple taxa with an equally high score, we only assigned  
200 taxonomy to the lowest common ancestor of the ambiguous hits. The resulting taxonomic hits  
201 were filtered using a selection criterion (% sequence similarity x length of overlap). Family-level  
202 matches were reported using a minimum of 95% selection criterion, genus-level matches were  
203 reported using a minimum of 98% selection criterion and species-level matches were reported  
204 using a 100% or perfect match. All taxa detected were verified using the WoRMS [33] and EOL  
205 [34] databases and spurious or irrelevant hits (e.g. terrestrial or domestic species) were  
206 omitted.

## 207 *Statistical Analysis*

208 All statistical analyses were performed using R v3.5.1 [35]. Sampling sites in 2018 (250  
209 mL) and 2019 (1.5 L) did not overlap completely therefore samples with different volumes were  
210 collected in different locations and different years, meaning no direct comparisons between  
211 samples can be made. However, we made general comparisons across all small volume samples  
212 and all large volume samples. Additionally, previous studies in this region suggest that spatial  
213 differences in community structure are small compared to community changes by water depth  
214 [19]. We used a robust two-way ANOVA ( $\alpha = 0.05$ ) implemented using the '*Rfit*' package v0.24.2  
215 [36] to compare the DNA concentrations in each sample between sampling volumes and  
216 between sampling depths, categorized as shallow (<500 m), mid-depth (500-1400 m) or deep  
217 (>1400 m). Shallow includes samples from the surface and the deep scattering layer for some  
218 stations. Mid-depth includes samples from the deep scattering layer and the bottom for some  
219 stations. Deep includes only samples from the bottom. Depth categories were chosen based on  
220 the distribution of depths sampled at each site and preliminary data exploration (see S2 Fig).  
221 Using data from the three markers used on 2018 and 2019 samples (COI MiniFishE, 12Steleo,  
222 12S MiFishU), we used a robust two-way ANOVA to compare the number of ESVs recovered in  
223 each sample between sampling volumes and between sampling depths. Post-hoc comparisons  
224 between groups were performed using the '*rcompanion*' package v1.13.2 [37]. We used  
225 Levene's test to determine if the variance in DNA concentration and number of ESVs differed  
226 between years and water depths.

227 We assessed the performance of different primer sets by comparing the number of taxa  
228 detected and the resolution of taxonomic assignments for all markers, with a particular focus

229 on the recovery and resolution of fishes. In addition, we used a multi-species, multi-scale  
230 occupancy modeling framework to compare the detection probabilities of all fish specific  
231 primer sets (12S MiFishU, 12Steleo, COI MiniFishE) across fish taxa while accounting for false  
232 negatives following McClenaghan et al. [38]. We included water depth (meters) as a covariate  
233 at the level of occupancy and primer set as covariate at the level of detection probability (see  
234 S1 File for model formulation and detailed methods). We ran two models using observations  
235 from different levels of taxonomic resolution: fish species and fish families.

236 We compared the fish taxa detected via eDNA metabarcoding to the fish taxa detected  
237 via conventional survey methods for a single sampling expedition (2019 eDNA and 2019 pelagic  
238 IKMT sampling). This represents equal field sampling effort for both methods. We summarized  
239 the total number of taxa detected using each method at multiple taxonomic levels (family,  
240 genus, and species). Additionally, we summarize the total number of taxa recovered from  
241 multiple years and methods of conventional sampling.

242

## 243 **Results**

### 244 *General Sequencing Summary*

245 The mean number of sequences recovered per sample per amplicon after bioinformatic  
246 filtering was 1,250,418 (range: 16 – 13,603,412) yielding an average of 706 (range: 1-6003) ESVs  
247 per sample per amplicon and a total of 148,339 ESVs. 77.8% of the ESVs matched a sequence in  
248 the reference database, although the taxonomic rank assigned to each ESV was variable and  
249 resolution differed between amplicons (Table 2).

250 **Table 1. ESV level summary of taxonomic identifications via metabarcoding for each primer set.** # ESV indicates the total number  
 251 of ESVs detected, # ESV Tax represents number of ESVs with taxonomic matches at any level, # Metazoan ESV indicates the number  
 252 of ESVs identified as Metazoa ( $\geq 0.9$  selection criteria, kingdom = Metazoa) and # Fish ESV indicates the number of ESVs identified as  
 253 fish ( $> 0.9$  selection criteria, class = Actinopteri or Chondrichthyes). Table (A) summarizes the number and percentage of metazoan  
 254 ESVs assigned to each taxonomic level and table (B) summarizes the number and percentage of fish ESVs assigned to each taxonomic  
 255 level.

256

**A**

| Primer Set  | # ESV  | # ESV Tax | # Metazoan ESV | Family |       | Genus |       | Species |       |
|-------------|--------|-----------|----------------|--------|-------|-------|-------|---------|-------|
|             |        |           |                | # ESV  | %     | # ESV | %     | # ESV   | %     |
| 12S         | 890    | 245       | 70             | 69     | 98.6% | 68    | 97.1% | 14      | 20.0% |
| 12Steleo    | 1,192  | 1,106     | 312            | 309    | 99.0% | 184   | 59.0% | 22      | 7.1%  |
| 12S MiFishU | 13,228 | 12,935    | 73             | 69     | 94.5% | 58    | 79.5% | 14      | 19.2% |
| 18SV9M      | 7,081  | 6,878     | 72             | 38     | 52.8% | 24    | 33.3% | 7       | 9.7%  |
| COI F230    | 16,252 | 15,952    | 57             | 0      | 0.0%  | 0     | 0.0%  | 0       | 0.0%  |
| COI FishE   | 89,506 | 61,647    | 498            | 422    | 84.7% | 166   | 33.3% | 70      | 14.1% |
| COI Leray   | 20,190 | 16,628    | 44             | 40     | 90.9% | 35    | 79.5% | 22      | 50.0% |

**B**

| Primer Set  | # ESV  | # ESV Tax | # Fish ESV | Family |        | Genus |        | Species |       |
|-------------|--------|-----------|------------|--------|--------|-------|--------|---------|-------|
|             |        |           |            | # ESV  | %      | # ESV | %      | # ESV   | %     |
| 12S         | 890    | 245       | 2          | 2      | 100.0% | 2     | 100.0% | 1       | 50.0% |
| 12Steleo    | 1,192  | 1,106     | 110        | 107    | 97.3%  | 49    | 44.5%  | 7       | 6.4%  |
| 12S MiFishU | 13,228 | 12,935    | 29         | 27     | 93.1%  | 21    | 72.4%  | 4       | 13.8% |
| 18SV9M      | 7,081  | 6,878     | 9          | 2      | 22.2%  | 0     | 0.0%   | 0       | 0.0%  |
| COI F230    | 16,252 | 15,952    | 2          | 0      | 0.0%   | 0     | 0.0%   | 0       | 0.0%  |
| COI FishE   | 89,506 | 61,647    | 19         | 16     | 84.2%  | 12    | 63.2%  | 9       | 47.4% |
| COI Leray   | 20,190 | 16,628    | 0          | 0      | 0.0%   | 0     | 0.0%   | 0       | 0.0%  |

257 A total of 21 fish families, 23 genera and 15 species were identified using eDNA from  
258 2018 and 2019 samples across all markers (Table 3). In the deep-water samples (>1400 m), 11  
259 fish families, 11 genera and 8 species were identified. The fish species detected included several  
260 deep-water and demersal specialists, such as Bigelow's Ray (*Rajella bigelowi*), Agassiz' Slickhead  
261 (*Alepocephalus agassizii*), Greenland Dwarf Snailfish (*Pseudnos groenlandicus*), along with the  
262 Roundnose Grenadier (*Coryphaenoides rupestris*) and the Northern Wolffish (*Anarhichas*  
263 *denticulatus*), which are listed as Critically Endangered and Endangered, respectively on the  
264 IUCN Red List [39,40]. Several globally important members of the mesopelagic community were  
265 also detected, including Glacier Lanternfish (*Benthoosema glaciale*) and Veiled Anglemouth  
266 (*Cyclothone microdon*). In addition to the fishes, 13 metazoan phyla were detected, where 58  
267 families, 39 genera, 25 species were assigned names (S2 Table).

### 268 *Volume Comparison*

269 Based on a two-way ANOVA, there was a significant increase in the total amount of DNA  
270 recovered (as measured by fluorometry of DNA extracts) from the 1.5-liter samples collected in  
271 2019 compared to the 250 mL samples from 2018 ( $F = 219.32$ ,  $df = 1$ ,  $p < 0.001$ ; Figure 1A).  
272 Water depth also had a significant effect on the amount of DNA recovered ( $F = 35.64$ ,  $df = 2$ ,  $p <$   
273  $0.001$ ), with a lower DNA concentration recovered from deep water samples (>1400 m)  
274 compared to mid-depth (500-1400 m) and shallow (<500 m) samples.

275

276



277 **Table 2. Summary of all fish taxa identified in seawater samples, indicating whether or not**  
 278 **the taxa was detected at each depth (shallow < 500 m , mid 500 – 1400 m , deep > 1400 m)**  
 279 **and the total number of samples in which the taxa was detected.**

| Order              | Family           | Genus          | Species                             | Deep | Mid | Shallow | # Samples |
|--------------------|------------------|----------------|-------------------------------------|------|-----|---------|-----------|
| Alepocephaliformes | Alepocephalidae  | Alepocephalus  | <i>Alepocephalus agassizii</i>      | Y    |     |         | 1         |
| Alepocephaliformes | Alepocephalidae  | Alepocephalus  |                                     | Y    |     | Y       | 4         |
| Alepocephaliformes | Alepocephalidae  |                |                                     | Y    |     | Y       | 2         |
| Anguilliformes     | Synphobranchidae | Synphobranchus |                                     |      | Y   | Y       | 2         |
| Argentiniformes    | Bathylagidae     | Bathylagus     | <i>Bathylagus euryops</i>           | Y    | Y   |         | 2         |
| Argentiniformes    | Bathylagidae     | Bathylagus     |                                     | Y    | Y   |         | 3         |
| Argentiniformes    | Bathylagidae     |                |                                     | Y    |     |         | 1         |
| Aulopiformes       | Paralepididae    | Paralepis      | <i>Paralepis coregonoides</i>       |      | Y   |         | 1         |
| Beryciformes       | Melamphaidae     | Poromitra      |                                     | Y    | Y   |         | 2         |
| Beryciformes       | Melamphaidae     |                |                                     |      | Y   |         | 1         |
| Clupeiformes       | Clupeidae        |                |                                     | Y    |     | Y       | 3         |
| Gadiformes         | Macrouridae      | Coryphaenoides | <i>Coryphaenoides rupestris</i>     |      | Y   |         | 1         |
| Gadiformes         | Macrouridae      | Macrourus      |                                     |      | Y   |         | 2         |
| Gadiformes         | Macrouridae      |                |                                     | Y    | Y   | Y       | 12        |
| Gadiformes         | Moridae          | Antimora       | <i>Antimora rostrata</i>            | Y    |     | Y       | 4         |
| Gadiformes         | Moridae          | Antimora       |                                     | Y    |     | Y       | 4         |
| Myctophiformes     | Myctophidae      | Benthoosema    | <i>Benthoosema glaciale</i>         | Y    | Y   | Y       | 11        |
| Myctophiformes     | Myctophidae      | Lampanyctus    | <i>Lampanyctus macdonaldi</i>       | Y    | Y   | Y       | 6         |
| Myctophiformes     | Myctophidae      | Lampanyctus    |                                     | Y    | Y   | Y       | 7         |
| Myctophiformes     | Myctophidae      | Notoscopelus   |                                     |      |     | Y       | 1         |
| Myctophiformes     | Myctophidae      | Protomyctophum |                                     |      | Y   | Y       | 5         |
| Myctophiformes     | Myctophidae      |                |                                     | Y    | Y   | Y       | 41        |
| Perciformes        | Anarhichadidae   | Anarhichas     | <i>Anarhichas denticulatus</i>      |      | Y   |         | 1         |
| Perciformes        | Anarhichadidae   | Anarhichas     |                                     |      | Y   | Y       | 4         |
| Perciformes        | Anarhichadidae   |                |                                     |      | Y   | Y       | 2         |
| Perciformes        | Cottidae         | Icelus         |                                     |      | Y   | Y       | 2         |
| Perciformes        | Liparidae        | Pseudnos       | <i>Pseudnos groenlandicus</i>       | Y    |     | Y       | 2         |
| Perciformes        | Liparidae        | Pseudnos       |                                     |      |     | Y       | 1         |
| Perciformes        | Pholidae         | Pholis         |                                     |      |     | Y       | 1         |
| Perciformes        | Pholidae         |                |                                     |      |     | Y       | 2         |
| Perciformes        | Sebastidae       | Sebastes       | <i>Sebastes mentella</i>            |      | Y   |         | 2         |
| Perciformes        | Sebastidae       | Sebastes       |                                     |      | Y   |         | 2         |
| Perciformes        | Zoarcidae        |                |                                     |      |     | Y       | 2         |
| Pleuronectiformes  | Pleuronectidae   | Reinhardtius   | <i>Reinhardtius hippoglossoides</i> |      | Y   |         | 1         |
| Pleuronectiformes  | Pleuronectidae   |                |                                     |      | Y   |         | 1         |
| Rajiformes         | Rajidae          | Amblyraja      |                                     | Y    |     |         | 2         |
| Rajiformes         | Rajidae          | Rajella        | <i>Rajella bigelowi</i>             | Y    |     |         | 2         |

|                  |                |            |                             |   |   |   |   |
|------------------|----------------|------------|-----------------------------|---|---|---|---|
| Rajiformes       | Rajidae        | Rajella    |                             | Y |   | 2 |   |
| Rajiformes       | Rajidae        |            |                             | Y |   | 2 |   |
| Salmoniformes    | Salmonidae     |            |                             | Y | Y | 2 |   |
| Stomiiformes     | Gonostomatidae | Cyclothone | <i>Cyclothone microdon</i>  | Y | Y | Y | 6 |
| Stomiiformes     | Gonostomatidae | Cyclothone |                             | Y | Y |   | 9 |
| Stomiiformes     | Gonostomatidae |            |                             | Y | Y |   | 4 |
| Stomiiformes     | Stomiidae      | Stomias    | <i>Stomias boa</i>          | Y | Y |   | 2 |
| Stomiiformes     | Stomiidae      | Stomias    |                             | Y | Y |   | 2 |
| Uranoscopiformes | Ammodytidae    | Ammodytes  | <i>Ammodytes hexapterus</i> |   | Y |   | 1 |

280

281 Based on a two-way ANOVA, there were significantly more ESVs detected in the 1.5-liter

282 2019 samples compared to the 250 mL 2018 samples ( $F = 88.28$ ,  $df = 1$ ,  $p < 0.001$ ; Figure 1B).

283 Additionally, there was significantly less variance in the number of ESVs recovered from the

284 larger volume samples ( $F = 30.00$ ,  $df = 1$ ,  $p < 0.001$ ). The different sampling volumes were

285 collected in different years and at different locations so no direct comparisons of the

286 biodiversity detected by volume could be made. There was a significant difference in the

287 number of ESVs recovered between sampling depths ( $F = 6.53$ ,  $df = 2$ ,  $p = 0.002$ ). Post-hoc

288 comparisons revealed that large volume mid depth samples from 2019 recovered the most

289 ESVs. The number of ESVs recovered from large volume deep samples in 2019 was not

290 significantly higher than the number of ESVs detected in any of the small volume water

291 samples. See S3 Fig for a comparison between DNA concentration and number of ESVs by

292 sampling location (surface, deep scattering layer, bottom).

293

294 **Fig 1. Comparison of (A) DNA concentration ( $\mu\text{g}/\mu\text{L}$ ) in extracts and (B) number of ESVs**  
 295 **recovered from small volume samples collected in 2018 and large volume samples collected**  
 296 **in 2019 at various depths (shallow < 500 m, mid 500-1400 m, deep >1400 m). The lines inside**  
 297 **the boxes represents the median values, the top and bottom of the boxes represent the 75%**

298 and 25% quartiles. The whiskers represent 1.5 times the inter-quartile range (IQR). Outliers (any  
299 data beyond 1.5\*IQR) are shown by circles. Different letters indicate significant differences.

300

### 301 *Marker Comparison*

302 Of the seven primers sets tested on the 2018 samples, the fish-targeted 12Steleo, 12S  
303 MiFishU and COI MiniFishE primer sets were the most effective at detecting fish with 11, 8 and  
304 3 families detected by each primer set respectively. 12Steleo also provided the highest  
305 resolution with 7 species identified. COI Leray and COI F230 failed to detect any fish families.  
306 The two primer sets that identified the most metazoan families other than fish, were 18SV9M  
307 and COI FishE, which detected 18 and 12 families in 2018 samples, respectively. The three  
308 primer sets which performed well for fishes were run on samples from 2019 (12Steleo, 12S  
309 MiFishU and COI FishE) to maximize fish detection while also identifying a range of metazoans.  
310 An additional three fish families and 22 metazoan families were detected in the 2019 samples.

311 For the three primer sets used across both years, no single fish species was detected by  
312 all primer sets and all three primer sets detected at least one species that was unique to that  
313 primer set. Occupancy modeling revealed taxa specific variability in probabilities of detection  
314 between primer sets at the species and family level (Figure 2 & 3), however when comparing  
315 the primer sets across the whole fish community, there was little difference in the community  
316 mean probability of detection for each primer set (Figure 4).

317

318 **Fig 2. Estimated detection probability for each fish species with each primer set based on**  
319 **multi-species, multi-scale occupancy modeling.** The lines inside the boxes represents the

320 median values, the top and bottom of the boxes represent the 75% and 25% quartiles. The  
321 whiskers represent 1.5 times the inter-quartile range (IQR).

322

323 **Fig 3. Estimated detection probability for each fish family with each primer set based on**  
324 **multi-species, multi-scale occupancy modeling.** The lines inside the boxes represents the  
325 median values, the top and bottom of the boxes represent the 75% and 25% quartiles. The  
326 whiskers represent 1.5 times the inter-quartile range (IQR).

327

328 **Fig 4. Community mean probabilities of detection for each primer set based on a multi-**  
329 **species, multi-scale occupancy model using fish family level data only.** Similar results were  
330 seen from the fish species-level model. The lines inside the boxes represents the median values,  
331 the top and bottom of the boxes represent the 75% and 25% quartiles. The whiskers represent  
332 1.5 times the inter-quartile range (IQR).

333

### 334 *Morphology & eDNA Comparison*

335 Conventional surveys were conducted using multiple methods on three transects in the  
336 sampling area. These surveys were performed over multiple years and on multiple sampling  
337 expeditions and allowed us to assemble an inventory of species for the region. Overall, these  
338 morphological surveys identified 27 species, 25 genera and 18 families in the sampling area. To  
339 directly compare between conventional methods and eDNA, we considered only morphological  
340 data that was generated during the same sampling expedition as eDNA sample collections.  
341 There was a high degree of overlap in taxa detected between eDNA and identified via  
342 morphology (i.e. via IKMT pelagic trawls), but several taxa were unique to metabarcoding  
343 (Figure 5). A total of 14 fish species, 21 genera and 16 families were identified using eDNA while  
344 10 fish species, 8 genera and 6 families were identified morphologically.

345

346 **Fig 5. Comparison of the number of fish taxa detected at various taxonomic levels (species,**  
347 **genus, family) between sampling methods (eDNA metabarcoding vs. capture and**  
348 **morphological identification using IKMT pelagic trawls) for a single sampling expedition in**  
349 **2019. Conventional methods are shown in purple and eDNA is shown in orange.**

350

## 351 **Discussion**

352 We demonstrated a successful protocol for the detection of deep-sea fishes using eDNA  
353 from seawater samples collected at depths down to 2500 m. Our results suggest that eDNA is  
354 less abundant in seawater from depths > 1400 m, a factor which should be considered for  
355 sampling designs of future deep-sea eDNA studies. The physical characteristics of the deep  
356 ocean (e.g. lower temperature, less sunlight) suggest DNA persists longer in this environment  
357 than at the surface [41,42], however the lower DNA concentration may reflect the different  
358 biological community present, with less abundant plankton and more species with low  
359 metabolic rates living in the deep ocean [18,43,44]. We recommend the sampling protocol  
360 followed in 2019 where larger water volumes ( $\geq 1.5$  L) were collected, particularly for sampling  
361 the deep marine environment where the amount of DNA recovered from samples was lower.  
362 While the number of ESVs recovered from large volume deep samples was not significantly  
363 higher than the small volume samples, the reduced variance in the number of ESVs recovered  
364 suggests a more robust sampling method. Increasing the sequencing depth may be a means to  
365 make up for low DNA recovery in samples such as this. Indeed, in this study, the samples were  
366 sequenced at much higher depth ( $\sim 1,000,000$  reads per sample per amplicon) than most  
367 metabarcoding studies [22]. Despite an equally high sequencing depth in the small volume and  
368 low DNA concentration samples, the number of ESVs recovered was consistently higher in large

369 volume and high DNA concentration samples. These results highlight the need for  
370 metabarcoding sampling methods to be tailored to the sampling environment and for further  
371 research into the origin, persistence, and degradation of eDNA in marine systems. Much of the  
372 research on the dynamics of eDNA has focused on freshwater systems (e.g. [45–47]) and much  
373 less is known about this cycle for eDNA in marine environments, particularly in the deep ocean  
374 (but see [48,49]). As our understanding of eDNA dynamics in the deep ocean progresses, eDNA  
375 can be a reliable way of detecting deep sea organisms, provided appropriate sampling methods  
376 are used.

377         When field sampling protocols are optimized for a particular system, there are often  
378 logistical constraints that must be considered in addition to the biological factors. In this study,  
379 the cold storage of large volume water samples on the sampling vessel was a limitation and  
380 therefore large volume samples were filtered *in situ* on the vessel rather than in a dedicated  
381 pre-PCR lab where downstream processing occurred. While this allowed larger water volumes  
382 to be collected, it required additional personnel time on the vessel and there may have been an  
383 increased risk of contamination for filtering *in situ* on an operational vessel at sea. In this case,  
384 precautions were taken to minimize the contamination risk including decontaminating the lab  
385 and the addition of negative controls at every step in the field (sample collection, filtration) and  
386 subsequent laboratory steps (extraction, PCR amplification). The adaptability of the filtering  
387 process was essential for allowing the collection of large volume water samples in this study.  
388 We acknowledge that these additional changes to the protocol may have contributed to the  
389 different results seen in 2018 and 2019, however water sampling volume is known to affect the  
390 biodiversity recovered from metabarcoding samples [50] and was likely the primary factor

391 contributing to the observed differences between study years. The specific logistical constraints  
392 of sampling will be unique to each sampling mission and depend on the resources available, but  
393 they are an important consideration when optimizing sampling protocols.

394 We identified multiple primers sets that performed well for deep-sea fishes, but we also  
395 determined that these primer sets vary considerably in their detection probabilities within the  
396 fishes. It should also be noted that the fish-specific primers used in this study (12Steleo, 12S  
397 MiFishU) were designed to target bony fish and not cartilaginous fish. While we did detect one  
398 species of cartilaginous fish (*Rajella bigelowi*) using 12Steleo, alternative primers should be  
399 considered for studies targeting cartilaginous fish (e.g. 12S MiFishE [29]). The fish primer sets  
400 used in this study recovered many fish taxa, however the species-level resolution was not  
401 always consistently high. For example, for the 12Steleo primer set, 110 fish ESVs were  
402 recovered and only 7 (6.4%) were identified to the species level (as seen in Table 2). The low  
403 resolution is due to a combination of low sequence diversity between species (where query  
404 sequences matched multiple species in the reference database) and poor reference database  
405 coverage (where query sequences did not match any reference sequences at our species-level  
406 threshold) [51]. This reinforces the importance of marker selection and highlights the need to  
407 use multiple markers to maximize detection and taxonomic resolution even within a relatively  
408 narrow target group, such as fish. Integrating data from multiple primer sets from multiple  
409 marker regions is often recommended for metabarcoding-based biodiversity surveys [52–55].  
410 This also highlights the need for improved species coverage in reference databases. We also  
411 identified a primer set (COI MiniFishE [24]) that performs well for a range of metazoan taxa in  
412 addition to fishes, suggesting this would be a useful primer set for comprehensive biodiversity

413 assessments in marine environments. Conversely, one of the primer sets that has been used in  
414 a number of marine metabarcoding papers (COI Leray; mlCOLintF/ jgHCO2198 [23]) did not  
415 detect any fish taxa and hence is not recommended for analyses of fish biodiversity. Using deep  
416 sequencing with multiple primer sets is a simple strategy that can capture deep sea biodiversity  
417 especially for less abundant and elusive fish taxa.

418         The fish taxa detected using eDNA metabarcoding were comparable to those identified  
419 via conventional fish survey methods, although several taxa were unique to each method. This  
420 is consistent with other studies comparing eDNA to other methods of biodiversity assessment  
421 (e.g. [56,57]). When looking at a single sampling expedition, eDNA captured more fish diversity  
422 than conventional methods, and did so from rosette deployments that were used to fulfil other  
423 mission objectives (i.e. water sampling). Given the expense and time constraints associated  
424 with large research vessels, achieving such efficiencies is noteworthy. Furthermore, the relative  
425 simplicity of eDNA sample collection allows for synchronous usage of hydroacoustics and *in-situ*  
426 sensors. Metabarcoding also has the added benefit of potentially detecting species outside the  
427 target taxa. While this is dependent on the primer sets selected, the ability to detect species  
428 from all trophic levels and life histories from the same sample drastically increases the  
429 efficiency of biodiversity assessments by minimizing the number of different sampling methods  
430 required to holistically survey an ecosystem (e.g. [58]). Furthermore, various marine habitats  
431 (e.g. pelagic, demersal) can be sampled using the same methods compared to conventional  
432 surveys where different capture methods and their associated biases are used in each habitat.  
433 And finally, eDNA samples, once collected, can be used for subsequent analyses with other  
434 primer sets to generate biodiversity data for other groups or to target specific species or their



435 populations without the need for additional sampling campaigns. For example, while the  
436 samples used in this study were collected and processed with the goal of detecting fishes, these  
437 same water samples could be processed with primers targeting corals to provide insight into  
438 deep-sea coral diversity without the need for additional sampling effort.

439         While there is a lot to be gained by applying metabarcoding tools to surveying the deep  
440 ocean, there are also limitations to this method. Since the biodiversity of this environment is  
441 not well-known, the reference database coverage for deep sea species is unlikely to be as  
442 comprehensive as coastal or freshwater systems. Low reference database coverage can reduce  
443 the taxonomic resolution of eDNA studies [59]. This limitation can be dealt with by generating a  
444 reference library for key fish species in the deep ocean alongside eDNA metabarcoding  
445 monitoring efforts. Metabarcoding is also limited in its quantitative ability [60] and most studies  
446 use a presence/absence approach (e.g. [61]). This method is very useful for assessing species  
447 richness and community structure [62], and determining species distributions [63], but the  
448 current methodology cannot be used to infer absolute abundance. Age structure, reproductive  
449 stage, and contaminant load are other examples of data that cannot be determined via eDNA.  
450 These factors will still rely on the capture of specimens, however eDNA can significantly  
451 increase our understanding of spatial and temporal distribution of species, which can be used  
452 to guide more detailed sampling where conventional sampling is required.

453         eDNA metabarcoding is a powerful approach for surveying biodiversity in the deep  
454 ocean. While future work will continue to improve these methods, such as increasing the  
455 taxonomic coverage in reference databases and refining sampling designs, this methodology  
456 can be employed immediately to complement ongoing biodiversity monitoring efforts in the

457 deep ocean. Given the vastness of the deep ocean environment, our limited knowledge of this  
458 region's biodiversity and the increasing anthropogenic pressures facing this fauna, there is huge  
459 potential for eDNA metabarcoding to revolutionize biodiversity monitoring and environmental  
460 stewardship in these areas.

## 461 **Acknowledgements**

462 We would like to thank Kerry Hobrecker for her assistance in sample processing at CEGA  
463 and Jasmin Schuster, Andrew Murphy, Amy McAllister, Thibaud DeZutter, Sheena Roul, Jennica  
464 Seiden and Catie Young for their assistance processing samples at sea. Samples used for this  
465 study were collected from the Canadian research icebreaker CCGS Amundsen with the support  
466 of the Amundsen Science program funded by the Canada Foundation for Innovation (CFI) Major  
467 Science Initiatives (MSI) Fund.

468

469

470

471

472

473

474

## 475 **References**

476

- 477 1. Webb TJ, Vanden Berghe E, O’Dor R. Biodiversity’s big wet secret: The global distribution of marine  
478 biological records reveals chronic under-exploration of the deep pelagic ocean. *PLOS ONE*. 2010;5:  
479 e10223. doi:10.1371/journal.pone.0010223
- 480 2. Bergstad OA. North Atlantic demersal deep-water fish distribution and biology: present knowledge  
481 and challenges for the future: deep-water fish distribution and biology. *J Fish Biol*. 2013;83: 1489–  
482 1507. doi:10.1111/jfb.12208
- 483 3. Costello MJ, Chaudhary C. Marine biodiversity, biogeography, deep-sea gradients, and  
484 conservation. *Curr Biol*. 2017;27: R511–R527. doi:10.1016/j.cub.2017.04.060
- 485 4. Koslow J. Continental slope and deep-sea fisheries: implications for a fragile ecosystem. *ICES J Mar*  
486 *Sci*. 2000;57: 548–557. doi:10.1006/jmsc.2000.0722
- 487 5. Levin LA, Le Bris N. The deep ocean under climate change. *Science*. 2015;350: 766–768.  
488 doi:10.1126/science.aad0126
- 489 6. Clark MR, Althaus F, Schlacher TA, Williams A, Bowden DA, Rowden AA. The impacts of deep-sea  
490 fisheries on benthic communities: a review. *ICES J Mar Sci*. 2016;73: i51–i69.  
491 doi:10.1093/icesjms/fsv123
- 492 7. Pais RT, Pastorinho MR. Chapter 2: Sampling Pelagic Marine Organisms. *Marine Ecology: Current*  
493 *and Future Developments*. Bentham Science Publishers; 2019.
- 494 8. Woodall L, Andradi-Brown D, Brierley A, Clark M, Connelly D, Hall R, et al. A multidisciplinary  
495 approach for generating globally consistent data on mesophotic, deep-pelagic, and bathyal  
496 biological communities. *Oceanography*. 2018;31. doi:10.5670/oceanog.2018.301
- 497 9. Pusceddu A, Bianchelli S, Martin J, Puig P, Palanques A, Masque P, et al. Chronic and intensive  
498 bottom trawling impairs deep-sea biodiversity and ecosystem functioning. *Proc Natl Acad Sci*.  
499 2014;111: 8861–8866. doi:10.1073/pnas.1405454111
- 500 10. Pham CK, Murillo FJ, Lirette C, Maldonado M, Colaço A, Ottaviani D, et al. Removal of deep-sea  
501 sponges by bottom trawling in the Flemish Cap area: conservation, ecology and economic  
502 assessment. *Sci Rep*. 2019;9. doi:10.1038/s41598-019-52250-1
- 503 11. Ruppert KM, Kline RJ, Rahman MS. Past, present, and future perspectives of environmental DNA  
504 (eDNA) metabarcoding: A systematic review in methods, monitoring, and applications of global  
505 eDNA. *Glob Ecol Conserv*. 2019;17: e00547. doi:10.1016/j.gecco.2019.e00547
- 506 12. Andruszkiewicz EA, Starks HA, Chavez FP, Sassoubre LM, Block BA, Boehm AB. Biomonitoring of  
507 marine vertebrates in Monterey Bay using eDNA metabarcoding. *Doi H*, editor. *PLOS ONE*.  
508 2017;12: e0176343. doi:10.1371/journal.pone.0176343

- 509 13. Lacoursière-Roussel A, Howland K, Normandeau E, Grey EK, Archambault P, Deiner K, et al. eDNA  
510 metabarcoding as a new surveillance approach for coastal Arctic biodiversity. *Ecol Evol.* 2018;8:  
511 7763–7777. doi:10.1002/ece3.4213
- 512 14. Everett MV, Park LK. Exploring deep-water coral communities using environmental DNA. *Deep Sea*  
513 *Res Part II Top Stud Oceanogr.* 2018;150: 229–241. doi:10.1016/j.dsr2.2017.09.008
- 514 15. Guardiola M, Uriz MJ, Taberlet P, Coissac E, Wangensteen OS, Turon X. Deep-sea, deep-  
515 sequencing: Metabarcoding extracellular DNA from sediments of marine canyons. Duperron S,  
516 editor. *PLOS ONE.* 2015;10: e0139633. doi:10.1371/journal.pone.0139633
- 517 16. Dell’Anno A, Carugati L, Corinaldesi C, Riccioni G, Danovaro R. Unveiling the biodiversity of deep-  
518 sea nematodes through metabarcoding: Are we ready to bypass the classical taxonomy? Bianchi  
519 CN, editor. *PLOS ONE.* 2015;10: e0144928. doi:10.1371/journal.pone.0144928
- 520 17. Fonseca VG, Sinniger F, Gaspar JM, Quince C, Creer S, Power DM, et al. Revealing higher than  
521 expected meiofaunal diversity in Antarctic sediments: a metabarcoding approach. *Sci Rep.* 2017;7.  
522 doi:10.1038/s41598-017-06687-x
- 523 18. Drazen JC, Seibel BA. Depth-related trends in metabolism of benthic and benthopelagic deep-sea  
524 fishes. *Limnol Oceanogr.* 2007;52: 2306–2316. doi:10.4319/lo.2007.52.5.2306
- 525 19. Côté D, Heggland K, Roul S, Robertson G, Fifield D, Wareham V, et al. Overview of the biophysical  
526 and ecological components of the Labrador Sea Frontier Area. Fisheries and Oceans Canada  
527 Canadian Science Advisory Secretariat; p. 59. Report No.: 2018/067.
- 528 20. Amundsen Science. Field Report: Integrated Studies and Ecosystem Characterization of the  
529 Labrador Deep Sea Ocean (ISECOLD) 2019. Amundsen Science; 2020.
- 530 21. Johnson M. Sound as a tool in marine ecology, from data on biological noises and the deep  
531 scattering layer. *J Mar Res.* 1948;7: 443–458.
- 532 22. Singer GAC, Fahner NA, Barnes JG, McCarthy A, Hajibabaei M. Comprehensive biodiversity analysis  
533 via ultra-deep patterned flow cell technology: a case study of eDNA metabarcoding seawater. *Sci*  
534 *Rep.* 2019;9: 5991. doi:10.1038/s41598-019-42455-9
- 535 23. Leray M, Yang JY, Meyer CP, Mills SC, Agudelo N, Ranwez V, et al. A new versatile primer set  
536 targeting a short fragment of the mitochondrial COI region for metabarcoding metazoan diversity:  
537 application for characterizing coral reef fish gut contents. *Front Zool.* 2013;10: 34.  
538 doi:10.1186/1742-9994-10-34
- 539 24. Shokralla S, Hellberg RS, Handy SM, King I, Hajibabaei M. A DNA Mini-Barcoding System for  
540 Authentication of Processed Fish Products. *Sci Rep.* 2015;5. doi:10.1038/srep15894
- 541 25. Gibson JF, Shokralla S, Curry C, Baird DJ, Monk WA, King I, et al. Large-Scale Biomonitoring of  
542 Remote and Threatened Ecosystems via High-Throughput Sequencing. Fontaneto D, editor. *PLOS*  
543 *ONE.* 2015;10: e0138432. doi:10.1371/journal.pone.0138432

- 544 26. Stoeck T, Bass D, Nebel M, Christen R, Jones MDM, Breiner H-W, et al. Multiple marker parallel tag  
545 environmental DNA sequencing reveals a highly complex eukaryotic community in marine anoxic  
546 water. *Mol Ecol*. 2010;19: 21–31. doi:10.1111/j.1365-294X.2009.04480.x
- 547 27. Riaz T, Shehzad W, Viari A, Pompanon F, Taberlet P, Coissac E. ecoPrimers: inference of new DNA  
548 barcode markers from whole genome sequence analysis. *Nucleic Acids Res*. 2011;39: e145–e145.  
549 doi:10.1093/nar/gkr732
- 550 28. Valentini A, Taberlet P, Miaud C, Civade R, Herder J, Thomsen PF, et al. Next-generation  
551 monitoring of aquatic biodiversity using environmental DNA metabarcoding. *Mol Ecol*. 2016;25:  
552 929–942. doi:10.1111/mec.13428
- 553 29. Miya M, Sato Y, Fukunaga T, Sado T, Poulsen JY, Sato K, et al. MiFish, a set of universal PCR primers  
554 for metabarcoding environmental DNA from fishes: detection of more than 230 subtropical marine  
555 species. *R Soc Open Sci*. 2015;2: 150088. doi:10.1098/rsos.150088
- 556 30. Martin C. Cutadapt removes adapter sequences for high-throughput sequencing reads.  
557 *EMBnet journal*. 2011;17: 10–12. doi:10.14806/ej.17.1.200
- 558 31. Callahan BJ, McMurdie PJ, Rosen MJ, Han AW, Johnson AJA, Holmes SP. DADA2: High-resolution  
559 sample inference from Illumina amplicon data. *Nat Methods*. 2016;13: 581–583.  
560 doi:10.1038/nmeth.3869
- 561 32. Altschul SF, Gish W, Miller W, Myers EW, Lipman DJ. Basic local alignment search tool. *J Mol Biol*.  
562 1990;215: 403–410. doi:10.1016/S0022-2836(05)80360-2
- 563 33. WoRMS Editorial Board. World Register of Marine Species. 2020 [cited 2 Jun 2020]. Available:  
564 <http://www.marinespecies.org> at VLIZ
- 565 34. Encyclopedia of Life. 2014 [cited 2 Jun 2020]. Available: <http://eol.org>
- 566 35. R Core Team. R: A language and environment for statistical computing. R Found Stat Comput  
567 Vienna Austria. 2018. Available: <https://www.R-project.org/>
- 568 36. Kloke JD, Mckean JW. Rfit: Rank-based estimation for linear models. *R J*. 2012;4: 57–64.
- 569 37. Mangiafico S. rcompanion: functions to support extension education program evaluation.  
570 Available: <https://CRAN.R-project.org/package=rcompanion>
- 571 38. McClenaghan B, Compson ZG, Hajibabaei M. Validating metabarcoding-based biodiversity  
572 assessments with multi-species occupancy models: a case study using coastal marine eDNA. *PLOS*  
573 *ONE*. 2020.
- 574 39. Collette B, Heessen H, Fernandes P. *Anarhichas denticulatus*. IUCN Red List Threat Species 2015.  
575 2020; e.T18155990A44739291.
- 576 40. Iwamoto T. *Coryphaenoides rupestris*. IUCN Red List Threat Species 2015. 2020;  
577 e.T15522149A15603540.

- 578 41. Eichmiller JJ, Best SE, Sorensen PW. Effects of Temperature and Trophic State on Degradation of  
579 Environmental DNA in Lake Water. *Environ Sci Technol*. 2016;50: 1859–1867.  
580 doi:10.1021/acs.est.5b05672
- 581 42. Strickler KM, Fremier AK, Goldberg CS. Quantifying effects of UV-B, temperature, and pH on eDNA  
582 degradation in aquatic microcosms. *Biol Conserv*. 2015;183: 85–92.  
583 doi:10.1016/j.biocon.2014.11.038
- 584 43. Hansen BK, Bekkevold D, Clausen LW, Nielsen EE. The sceptical optimist: challenges and  
585 perspectives for the application of environmental DNA in marine fisheries. *Fish Fish*. 2018;19: 751–  
586 768. doi:10.1111/faf.12286
- 587 44. Weikert H. The vertical distribution of zooplankton in relation to habitat zones in the area of the  
588 Atlantis I1 Deep, central Red Sea. : 15.
- 589 45. Dejean T, Valentini A, Duparc A, Pellier-Cuit S, Pompanon F, Taberlet P, et al. Persistence of  
590 environmental DNA in freshwater ecosystems. Gilbert JA, editor. *PLoS ONE*. 2011;6: e23398.  
591 doi:10.1371/journal.pone.0023398
- 592 46. Barnes MA, Turner CR, Jerde CL, Renshaw MA, Chadderton WL, Lodge DM. Environmental  
593 conditions influence eDNA persistence in aquatic systems. *Environ Sci Technol*. 2014;48: 1819–  
594 1827. doi:10.1021/es404734p
- 595 47. Sansom BJ, Sassoubre LM. Environmental DNA (eDNA) shedding and decay rates to model  
596 freshwater mussel eDNA transport in a river. *Environ Sci Technol*. 2017;51: 14244–14253.  
597 doi:10.1021/acs.est.7b05199
- 598 48. Andruszkiewicz EA, Sassoubre LM, Boehm AB. Persistence of marine fish environmental DNA and  
599 the influence of sunlight. Doi H, editor. *PLOS ONE*. 2017;12: e0185043.  
600 doi:10.1371/journal.pone.0185043
- 601 49. Collins RA, Wangensteen OS, O’Gorman EJ, Mariani S, Sims DW, Genner MJ. Persistence of  
602 environmental DNA in marine systems. *Commun Biol*. 2018;1. doi:10.1038/s42003-018-0192-6
- 603 50. Cantera I, Cilleros K, Valentini A, Cerdan A, Dejean T, Iribar A, et al. Optimizing environmental DNA  
604 sampling effort for fish inventories in tropical streams and rivers. *Sci Rep*. 2019;9.  
605 doi:10.1038/s41598-019-39399-5
- 606 51. Porter TM, Hajibabaei M. Over 2.5 million COI sequences in GenBank and growing. Arthofer W,  
607 editor. *PLOS ONE*. 2018;13: e0200177. doi:10.1371/journal.pone.0200177
- 608 52. Alberdi A, Aizpurua O, Gilbert MTP, Bohmann K. Scrutinizing key steps for reliable metabarcoding  
609 of environmental samples. Mahon A, editor. *Methods Ecol Evol*. 2018;9: 134–147.  
610 doi:10.1111/2041-210X.12849
- 611 53. Zhang GK, Chain FJJ, Abbott CL, Cristescu ME. Metabarcoding using multiplexed markers increases  
612 species detection in complex zooplankton communities. *Evol Appl*. 2018;11: 1901–1914.  
613 doi:10.1111/eva.12694

- 614 54. Hajibabaei M, Spall JL, Shokralla S, van Konynenburg S. Assessing biodiversity of a freshwater  
615 benthic macroinvertebrate community through non-destructive environmental barcoding of DNA  
616 from preservative ethanol. *BMC Ecol.* 2012;12: 28. doi:10.1186/1472-6785-12-28
- 617 55. Gibson J, Shokralla S, Porter TM, King I, van Konynenburg S, Janzen DH, et al. Simultaneous  
618 assessment of the macrobiome and microbiome in a bulk sample of tropical arthropods through  
619 DNA metasytematics. *Proc Natl Acad Sci.* 2014;111: 8007–8012. doi:10.1073/pnas.1406468111
- 620 56. Thomsen PF, Møller PR, Sigsgaard EE, Knudsen SW, Jørgensen OA, Willerslev E. Environmental DNA  
621 from seawater samples correlate with trawl catches of subarctic, deepwater fishes. Mahon AR,  
622 editor. *PLOS ONE.* 2016;11: e0165252. doi:10.1371/journal.pone.0165252
- 623 57. Closek CJ, Santora JA, Starks HA, Schroeder ID, Andruszkiewicz EA, Sakuma KM, et al. Marine  
624 vertebrate biodiversity and distribution within the central California current using environmental  
625 DNA (eDNA) metabarcoding and ecosystem surveys. *Front Mar Sci.* 2019;6.  
626 doi:10.3389/fmars.2019.00732
- 627 58. Stat M, Huggett MJ, Bernasconi R, DiBattista JD, Berry TE, Newman SJ, et al. Ecosystem  
628 biomonitoring with eDNA: metabarcoding across the tree of life in a tropical marine environment.  
629 *Sci Rep.* 2017;7. doi:10.1038/s41598-017-12501-5
- 630 59. Cristescu ME. From barcoding single individuals to metabarcoding biological communities: towards  
631 an integrative approach to the study of global biodiversity. *Trends Ecol Evol.* 2014;29: 566–571.  
632 doi:10.1016/j.tree.2014.08.001
- 633 60. Lamb PD, Hunter E, Pinnegar JK, Creer S, Davies RG, Taylor MI. How quantitative is metabarcoding:  
634 A meta-analytical approach. *Mol Ecol.* 2019;28: 420–430. doi:10.1111/mec.14920
- 635 61. Civade R, Dejean T, Valentini A, Roset N, Raymond J-C, Bonin A, et al. Spatial Representativeness of  
636 Environmental DNA Metabarcoding Signal for Fish Biodiversity Assessment in a Natural Freshwater  
637 System. Garcia de Leaniz C, editor. *PLOS ONE.* 2016;11: e0157366.  
638 doi:10.1371/journal.pone.0157366
- 639 62. Yamamoto S, Masuda R, Sato Y, Sado T, Araki H, Kondoh M, et al. Environmental DNA  
640 metabarcoding reveals local fish communities in a species-rich coastal sea. *Sci Rep.* 2017;7.  
641 doi:10.1038/srep40368
- 642 63. Muha TP, Rodríguez-Rey M, Rolla M, Tricarico E. Using environmental DNA to improve species  
643 distribution models for freshwater invaders. *Front Ecol Evol.* 2017;5. doi:10.3389/fevo.2017.00158
- 644
- 645
- 646
- 647

## 648 **Supporting Information**

649

650 **S1 Fig. Map of the sampling area in the Labrador Sea showing sampling sites along three**  
651 **transects that follow a depth gradient of approximately 500 m to 3000 m.** Colours of sampling  
652 sites indicate the year of eDNA sampling. Inset map shows the location of the sampling area on  
653 a global map. Map data source: Esri. Ocean Reference [basemap]. 1:6000000. Ocean Basemap.  
654 February 10, 2012.

655 [www.arcgis.com/home/item.html?id=5ae9e138a17842688b0b79283a4353f6](http://www.arcgis.com/home/item.html?id=5ae9e138a17842688b0b79283a4353f6). (Accessed: June  
656 15, 2020).

657 **S2 Fig. Scatterplot plot comparing water sampling depth and DNA concentration for eDNA**  
658 **water samples collected in the Labrador Sea in 2019.** The blue line represents the predicted  
659 values based on a generalized linear model with 95% confidence intervals shown in gray.

660 **S3 Fig. Comparison of (A) DNA concentration (pg/ $\mu$ L) in extracts and (B) number of ESVs**  
661 **recovered from small volume samples collected in 2018 and large volume samples collected**  
662 **in 2019 at various depth sampling locations (surface, deep scattering layer, bottom).** Different  
663 letters indicate significant differences.

664 **S1 Text. Detailed occupancy modeling methods and model structure.**

665 **S1 Table. Sampling summary table listing the sampling stations, their location, date of**  
666 **collection, sampling depths and approximate water depth.** Triplicate water samples were  
667 collected at each station and date listed.

668 **S2 Table. Summary of all metazoan taxa identified in seawater samples, indicating whether or**  
669 **not the taxa was detected at each depth ( shallow < 500 m , mid 500 – 1400 m , deep > 1400**  
670 **m) and the total number of samples in which the taxa was detected.**

671



**A**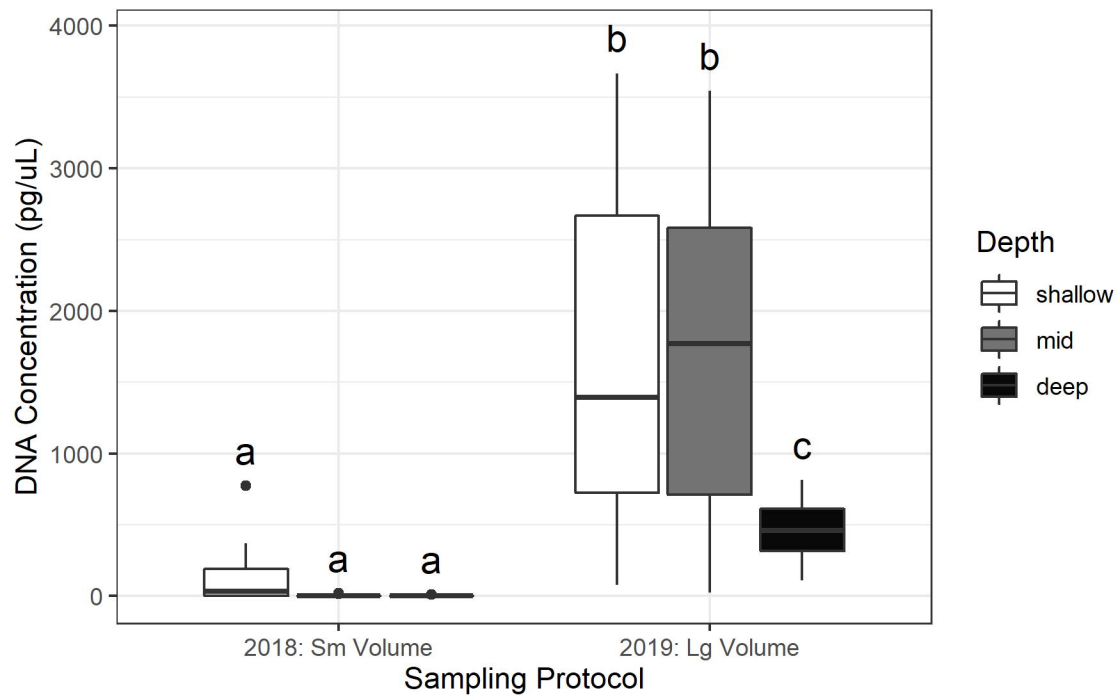**B**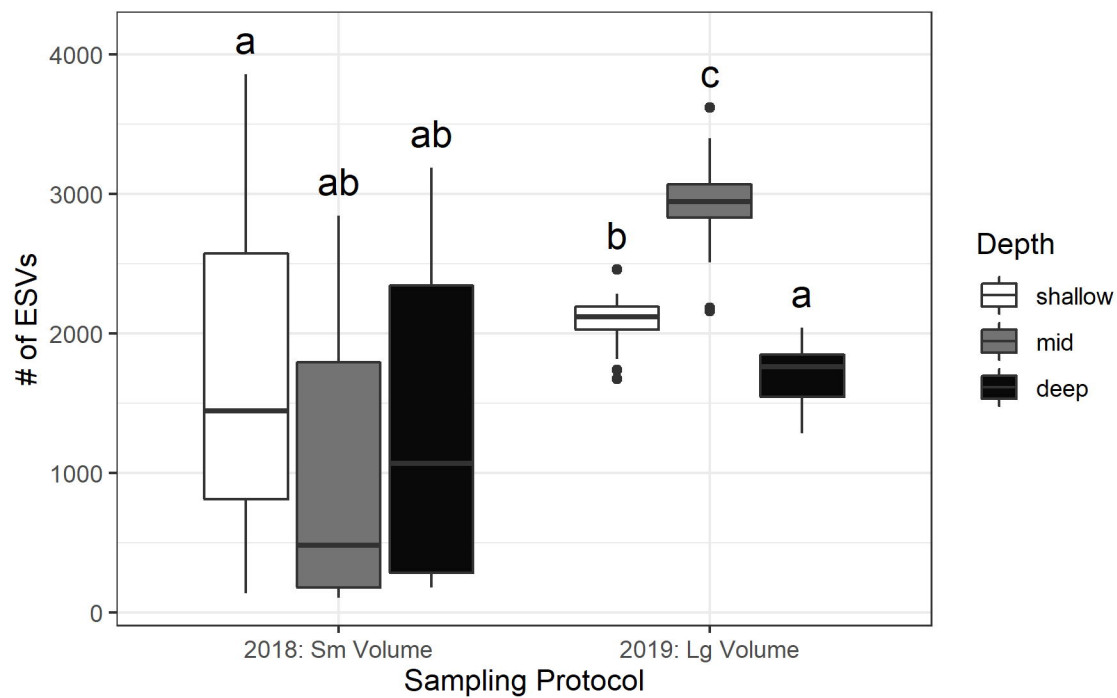

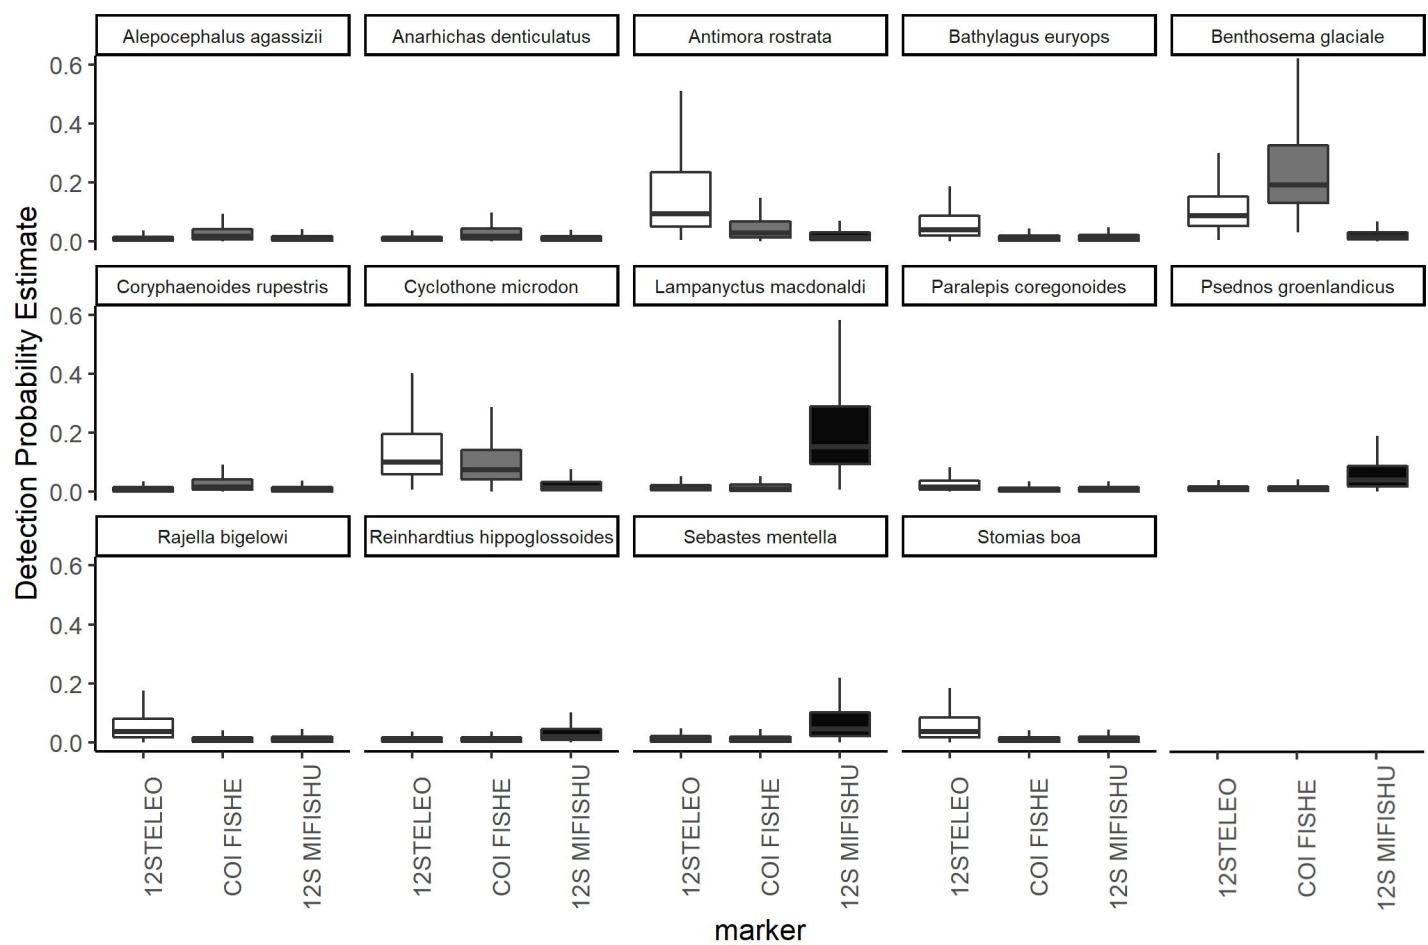

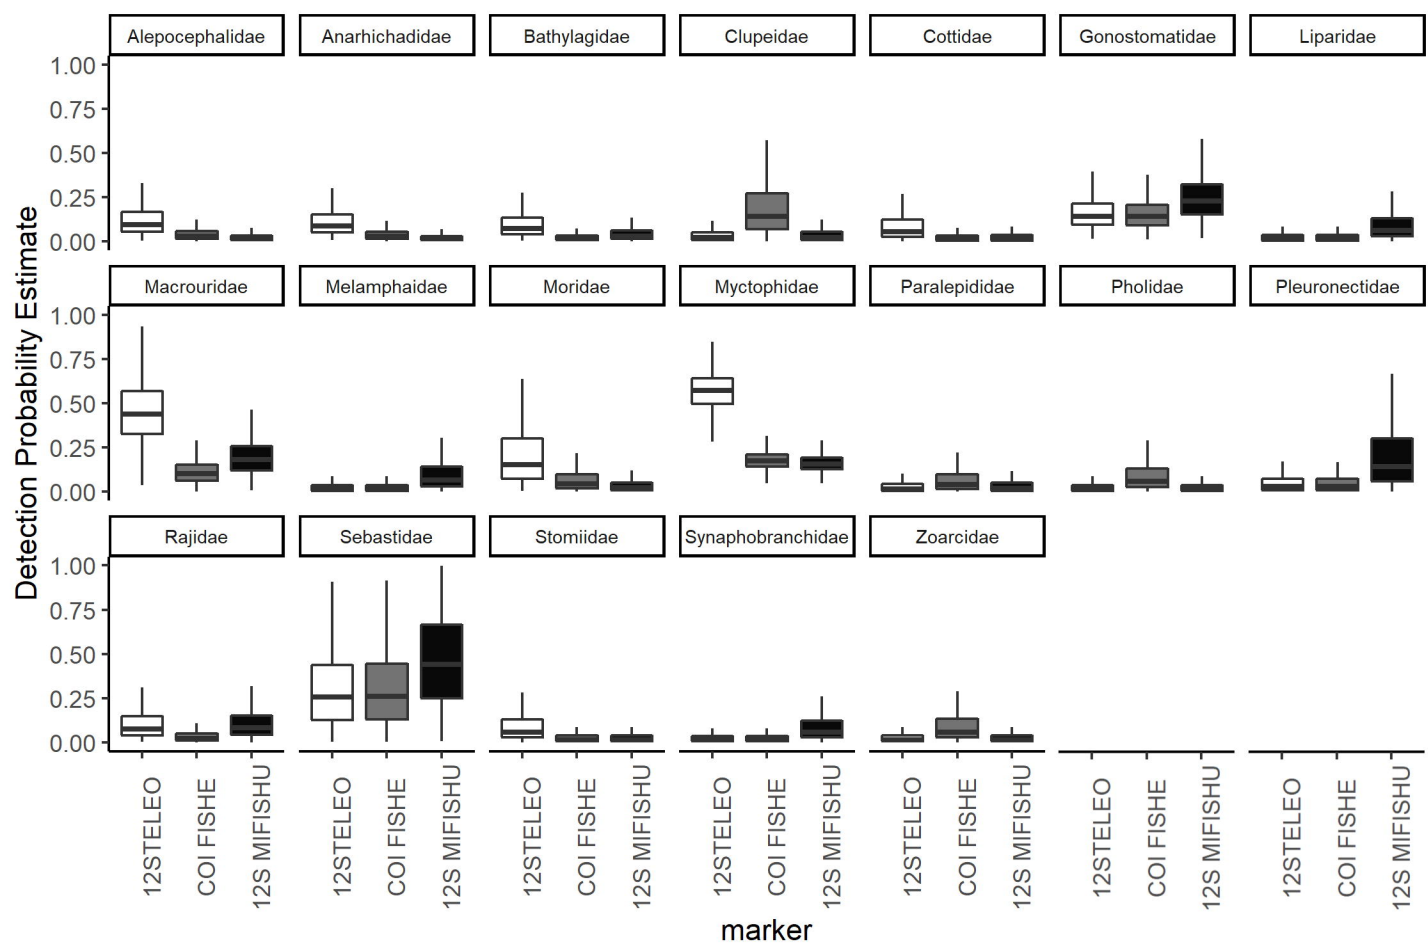

Community Mean

Detection Probability Estimate

0.4  
0.3  
0.2  
0.1  
0.0

12STELEO

COI FISHE

12S MIFISHU

Primer Set

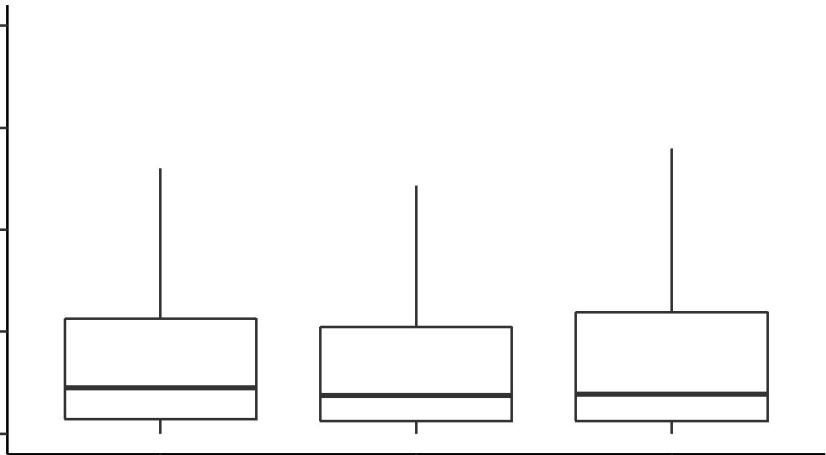

## Species

## Genus

## Family

eDNA

Morph

8

6

4

eDNA

Morph

16

5

3

eDNA

Morph

6

10

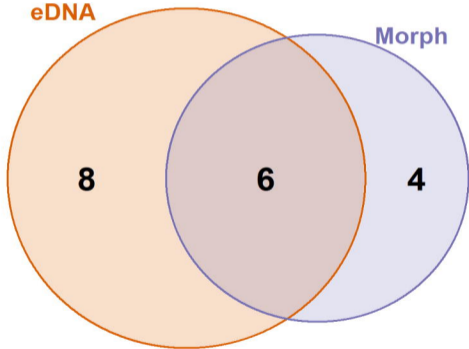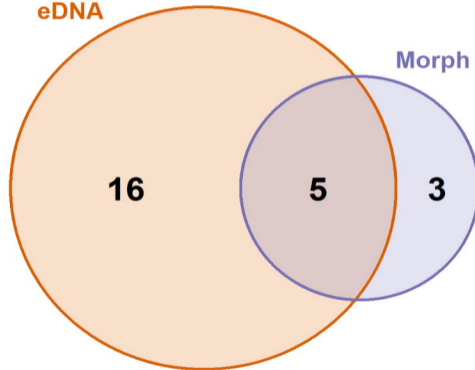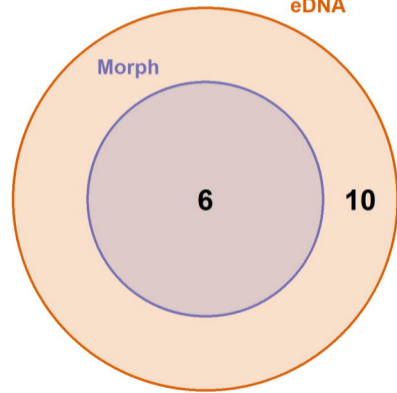

Source: https://biorxiv.org/content/10.1101/2020.07.10.197012v1.full.pdf
